# Supplementary material for: Metagenomics to Identify Viral Communities Associated with Porcine Respiratory Disease Complex in Tibetan Pigs in the Tibetan Plateau, China
Source: MDPI journal article supplement (doi:10.3390/pathogens13050404), 2024-05-13
Supplement: s1 [file s1]

## *Supplementary Material*

### **1 Supplementary Figures and Tables**

#### **1.1 Supplementary Tables**

**Table S1** Specific primers used to detect the viruses of PCV2, TTSuV1, TTSuV2, and PCMV in this study

| Virus  | Primer name <sup>a</sup> | Primers sequence (5'-3') | Length (bp) |
|--------|--------------------------|--------------------------|-------------|
| PCV2   | PCV2-F                   | GAAATCAACTCTGGCTGAGAC    | 547         |
|        | PCV2-R                   | CAAGTGGTGGGATGGTTAC      |             |
| TTSuV1 | TTSuV1-F                 | TACACTTCCGGGTTCAGGAGGCT  | 318         |
|        | TTSuV1-R                 | ACTCAGCCATTCGGAACCTCAC   |             |
| TTSuV2 | TTSuV2-F                 | AGTTACACATAACCACCAAACC   | 264         |
|        | TTSuV2-R                 | ATTACCGCCTGCCCCGATAGGC   |             |
| PCMV   | PCMV-F                   | CATCAGAGCCACGAAAT        | 579         |
|        | PCMV-R                   | GGAGAAGCATAGTAACCC       |             |

<sup>a</sup> F and R represent forward and reverse primers, respectively.
